1 ***Ddx3x* regulates B-cell development and light chain recombination in mice**

2 **Running title:** *Ddx3x* regulates B-cell development

3 Ke Liu<sup>\*,†</sup>, Jasmine Tuazon<sup>\*</sup>, Erik P. Karnele<sup>\*</sup>, Durga Krishnamurthy<sup>\*</sup>, Thomas Perlot<sup>‡</sup>, Michelle  
4 Foong-Sobis<sup>‡</sup>, Rebekah A Karns<sup>§</sup>, Malay Mandal<sup>¶</sup>, Damien Reynaud<sup>||,#</sup>, R. Hal Scofield<sup>\*\*,††,‡‡</sup>,  
5 Josef M. Penninger<sup>‡</sup>, John B. Harley<sup>\*,†,||,§§,¶¶</sup>, and Stephen N. Waggoner<sup>\*,†,||,¶¶</sup>

6 J.B.H. and S.N.W. contributed equally to this study.

7 ¶¶To whom correspondence should be addressed.

8 **Correspondence:**

9 Stephen N. Waggoner, PhD, 3333 Burnet Ave, ML 15012, Cincinnati, Ohio 45229  
10 Phone: +1(513)803-4607, Fax: +1(513)636-3068, E-mail: Stephen.Waggoner@cchmc.org

11 John B. Harley, MD, PhD, 3333 Burnet Ave, ML 15012, Cincinnati, Ohio 45229  
12 Phone: +1 (513)803-3665, Fax: +1 5(513)636-3068, Email: John.Harley@cchmc.org

13 **Affiliations:**

14 \*Center for Autoimmune Genomics and Etiology (CAGE), Cincinnati Children's Hospital  
15 Medical Center, Cincinnati, OH

16 †Immunology Graduate Training Program, University of Cincinnati College of Medicine,  
17 Cincinnati, OH

18 ‡IMBA, Institute of Molecular Biotechnology of the Austrian Academy of Sciences, Vienna  
19 BioCentre, Vienna, Austria.

20 §Division of Gastroenterology, Hepatology & Nutrition, Cincinnati Children's Hospital Medical  
21 Center, Cincinnati, OH

22 ¶Department of Medicine, Section of Rheumatology and Gwen Knapp Center for Lupus and  
23 Immunology Research, University of Chicago, Chicago, IL

24 ||Department of Pediatrics, University of Cincinnati College of Medicine, Cincinnati, OH

25 #Division of Experimental Hematology and Cancer Biology, Stem Cell Program, Cincinnati  
26 Children's Hospital Medical Center, Cincinnati, OH

27 \*\*Department of Medicine, University of Oklahoma, Oklahoma City, OK

28 ††U.S. Department of Veterans Affairs Medical Center, Oklahoma City, OK

29 ‡‡Arthritis & Clinical Immunology Program, Oklahoma Medical Research Foundation, Oklahoma  
30 City, OK

31 §§U.S. Department of Veterans Affairs Medical Center, Cincinnati, OH

32

33

34

35 **Abstract:**

36 *Ddx3x* encodes a DEAD box RNA helicase implicated in antiviral immunity and tumorigenesis.  
37 We find that hematopoietic *Ddx3x* deficiency in *Vav1-Cre* mice ( $\Delta Ddx3x$ ) results in altered  
38 leukocyte composition of secondary lymphoid tissues, including a marked reduction in mature B  
39 cells. This paucity of peripheral B cells is associated with deficits in B-cell development in the  
40 bone marrow, including reduced frequencies of small pre-B cells. Bone marrow chimera  
41 experiments reveal a B-cell intrinsic effect of *Ddx3x* deletion. Mechanistically,  $\Delta Ddx3x$  small pre-  
42 B cells exhibit lower expression of *Brwd1*, a histone reader that restricts recombination at the  
43 immunoglobulin kappa (*Igk*) locus. In fact, the B-cell deficits in  $\Delta Ddx3x$  mice resemble those of  
44 *Brwd1* mutant mice, and both strains of mice exhibit defective *Igk* rearrangement in small pre-B  
45 cells. The contribution of *Ddx3x* to *Brwd1* expression and light chain rearrangement constitutes  
46 the first evidence of a role for an RNA helicase in promoting B-cell development.

## 47 **Introduction**

48 RNA helicases are key regulators of gene expression that control almost all aspects of RNA  
49 metabolism from synthesis to degradation (1). The largest group of RNA helicases, the DEAD  
50 (Asp-Glu-Ala-Asp) box family, contain a characteristic DEAD-box and a helicase-C domain (2).  
51 Recent evidence reveals crucial unexpected roles for DEAD-box helicases in antiviral immunity  
52 (3-9).

53 DDX3X (DEAD-Box Helicase 3, X-linked) is a ubiquitously expressed helicase implicated in  
54 innate immunity and control of virus replication (9-12). *DDX3X* has a homolog on the Y  
55 chromosome, *DDX3Y* (91% identity), which is putatively only expressed in testis (13-15). The  
56 amino acid sequence homology between human and mouse DDX3X is >98%, implying  
57 evolutionary conservation (16). The ATP-dependent RNA helicase functions of DDX3X are  
58 involved in several steps of RNA processing that ultimately promote translation (17-19). These  
59 functions likely relate to the role of DDX3X in cell cycle control, apoptosis, and tumorigenesis  
60 (18-21). In addition, DDX3X participates in innate immune nucleic acid sensing that promotes  
61 interferon-beta (IFN- $\beta$ ) (12, 22). Given this myriad of functional roles, it is not surprising that  
62 DDX3X is targeted by several viruses to evade host immune responses and promote virus  
63 replication (10, 19, 23).

64 DDX3X is broadly expressed in hematopoietic cells (24) and mutations in *DDX3X* are linked to  
65 various cancers (18), including leukemia and lymphoma. Yet, the function of DDX3X in  
66 leukocytes remains largely unexplored. Since global deletion of *Ddx3x* is embryonically lethal  
67 (25), we generated a novel mouse model characterized by *Vav1-Cre*-driven deletion of floxed  
68 *Ddx3x* alleles in hematopoietic cells. We discovered a crucial function for *Ddx3x* in hematopoiesis,

69 particularly during B-cell development. *Ddx3x*-deficiency promotes abnormalities in B-cell  
70 receptor (BCR) light chain recombination that result in marked defects in B-cell development and  
71 a paucity of mature peripheral B cells.

72

## 73 **Materials and Methods**

74 **Mice.** *Ddx3x* floxed mice (*Ddx3x<sup>fl/fl</sup>*) were created by Dr. Josef Penninger (Vienna, Austria). The  
75 mice were backcrossed to the C57BL/6 background for eight generations and then bred with *Vav1-*  
76 *Cre* mice (MGI:3765313). Experiments made use of male hemizygous deficient mice  
77 (*Ddx3x<sup>fl/y</sup>Vav1-Cre<sup>+</sup>* or  $\Delta$ *Ddx3x*) and wild-type (WT) littermate controls (*Ddx3x<sup>fl/y</sup>Vav1-Cre<sup>neg</sup>* or  
78 *Ddx3x<sup>wt/y</sup>Vav1-Cre<sup>±</sup>*). We used C57BL/6 CD45.1<sup>+</sup> (BoyJ) mice from Jackson Laboratory (#002014)  
79 in bone marrow transplantation experiments. Mice were housed in a specific pathogen-free barrier  
80 facility, and experiments conducted with approval from the Cincinnati Children's Institutional  
81 Animal Care and Use Committee. Mice were used when 6 to 12 weeks old unless otherwise  
82 specified.

83 **Tissue harvest, cell isolation, and flow cytometry.** To examine bone marrow cells, mouse femura  
84 and tibias were flushed with 1× PBS (Corning) using a 10-mL syringe and a 26-gauge 3/8-inch  
85 needle (BD Worldwide). We filtered the resulting cell suspension through a 70µm filter mesh  
86 (Corning). Mouse spleens and lymph nodes were harvested and mashed on top of the 70µm filter  
87 mesh. Red blood cells were lysed using an ACK lysing buffer (Thermo Fisher).

88 Cells were stained with fluorochrome-labeled antibodies in 100µL flow buffer (2% fetal bovine  
89 sera in PBS) for 30 minutes at 4°C, then fixed with 100µL fixation buffer for 30 minutes at 4°C.  
90 Data were acquired on LSR II or Fortessa cytometers and analyzed by FACSDiva (BD Biosciences)  
91 and FlowJo (TreeStar). Bone marrow small pre-B cells (CD3<sup>-</sup>Ly6C<sup>-</sup>Ter119<sup>-</sup>CD11b<sup>-</sup>Gr-1<sup>-</sup>  
92 B220<sup>+</sup>CD43<sup>-</sup>IgM<sup>-</sup>IgD<sup>-</sup>) and splenic IgM<sup>+</sup> B cells (CD3<sup>-</sup>CD19<sup>+</sup>IgM<sup>hi</sup>) were sorted using a  
93 FACS Aria II (BD Biosciences).

94 **Bone marrow chimeras.** We harvested bone marrow cells from CD45.1<sup>+</sup> WT mice and CD45.2<sup>+</sup>

95  $\Delta Ddx3x$  mice and mixed these cells at 1:1, 1:2 or 1:4 ratios. We intravenously injected  $2.5 \times 10^6$   
96 cells into lethally irradiated (700 rad + 475 rad) CD45.1<sup>+</sup> WT recipient mice via the lateral tail  
97 vein. Mice were examined 14 to 17 weeks after transplantation.

98 **ELISA.** Blood was collected by cardiac puncture using a 1-mL syringe and 26-gauge 3/8-inch  
99 needle (BD Worldwide) and centrifuged at 3,000 rpm for 10 minutes. Supernatant was aliquoted  
100 and stored at -80°C. Mouse IgA, IgG, IgM, IgE, IgG1, IgG2c, IgG2b or IgG3 measured using  
101 ELISA Ready-SET-Go kits according to manufacturer's protocols (eBioscience).

102 **Microarray analysis.** We isolated total cellular RNA from sorted small pre-B cells using  
103 mirVana™ miRNA Isolation Kit (Thermo Fisher Scientific). RNA concentration and integrity  
104 were measured on an Agilent Bioanalyzer. Ovation Pico WTA kit (NuGen) was used to amplify  
105 and label RNA library. The RNA libraries were evaluated using GeneChip Mouse Gene 2.0 arrays  
106 (Affymetrix). RNA library preparation and GeneChip assays were performed by Cincinnati  
107 Children's Gene Expression Core. Raw data were used for analysis with GeneSpring GX software  
108 (v13.0, Agilent Technologies). We first applied standard RMA normalization and baseline  
109 transformation to all samples (n=4/group), then removed noise by applying a filter requiring a raw  
110 expression value >50. Unpaired t-tests were performed, with p<0.05 and fold change >1.5 were  
111 set as benchmarks for differential gene expression between experimental groups. A hierarchical  
112 clustered heatmap of the top 20 up-regulated and top 15 down-regulated genes were made using  
113 R software (64bit, v3.2.2). Genome data have been deposited in GEO  
114 (<https://www.ncbi.nlm.nih.gov/geo/>) under accession number GSE112549.

115 **Quantitative PCR analysis.** We isolated total cellular RNA from sorted small pre-B cells and  
116 splenic IgM<sup>+</sup> B cells using mirVana Kits. We performed reverse transcription using PrimeScript™

117 RT reagent Kit (Clontech). For qPCR, 10 $\mu$ L SYBR Green master mix (SYBR Premix Ex Taq™  
118 II, Clontech), 0.4 $\mu$ L Rox dye, 1.6 $\mu$ L of 10 $\mu$ M primer mix, 6 $\mu$ L water, and 2 $\mu$ L cDNA template  
119 were used in a total 20 $\mu$ L system per sample. Samples were run in triplicates on ABI 7500 Real-  
120 Time PCR System (Applied Biosystems). Target genes were normalized to actin or  $\beta$ 2-  
121 Microglobulin (B2M) mRNA expression levels. Forward and reverse primers used for quantitative  
122 PCR (qPCR) are as follows: *Ddx3x*-F 5'-ACCCCTATCCCAAAGTGCAT-3', *Ddx3x*-R 5'-  
123 TCATGACTGGAATGGCTTGT-3', *Actin*-F 5'- ATGCTCCCCGGGCTGTAT-3', *Actin*-R 5'-  
124 CATAGGAGTCCTTCTGACCCATTC-3', *Brwd1*-F 5'-TTGCTTCTGGCAGTGGGATTT-3',  
125 *Brwd1*-R 5'-GCTTTCAAGCTCGGCGATTT-3', *B2m*-F 5'-AGACTGATACATACGCCTGCA-  
126 3', *B2m*-R 5'-GCAGGTTCAAATGAATCTTCA-3', *Ig $\kappa$* -Germline-F 5'-  
127 GAGGGGGTTAAGCTTTCGCCTACCCAC-3', *Ig $\kappa$* -Germline-R 5'-  
128 GTTATGTCGTTCACTACTCGTCCTTGGTCAA-3', *degV $\kappa$*  5'-  
129 GGCTGCAGSTTCAGTGGCAGTGGRTCWGGGRAC-3', and  *$\kappa$ -J1-R* 5'-  
130 AGCATGGTCTGAGCACCGAGTAAAGG-3'.

131 **PCR analysis of *Ig $\kappa$*  rearrangement.** We performed semi-quantitative PCR assay with reverse  
132 transcribed cDNA using an updated protocol (26). Instead of genomic DNA, we performed PCR  
133 assays from cDNA using *V $\kappa$ -FW* (AGCTTCAGTGGCAGTGGRTCWGGGRAC) and *C $\kappa$*   
134 (CTTCCACTTGACATTGATGTC) primers, which target rearranged *V $\kappa$ -J $\kappa$*  transcripts. We  
135 sorted small pre-B cells from WT and  $\Delta$ *Ddx3x* mice. cDNA from WT splenic IgM<sup>+</sup> B cells was  
136 used as a positive control. *B2m* was amplified as an internal control. PCR products were evaluated  
137 on 1% agarose gel and quantified using ImageLab software (BIO-RAD). The intensity of the band  
138 for each rearrangement product (*V $\kappa$ -J $\kappa$ 1/2/4/5*) was divided by that of the corresponding *B2m* band,  
139 and the resulting value was then normalized to the values obtained from IgM<sup>+</sup> B cells.

140 ***Statistical analyses.*** Experiments were analyzed using GraphPad Prism (Version 6). Data are  
141 presented as mean  $\pm$  standard deviation (SD). Unless otherwise specified, significant differences  
142 were calculated using unpaired, two-tailed Student's t-test for two groups and one-way ANOVA  
143 for three groups, where  $p$  value is indicated by \* $p \leq 0.05$ , \*\* $p \leq 0.01$ , \*\*\* $p \leq 0.001$ , or \*\*\*\* $p \leq$   
144 0.0001.

145



## 146 **Results**

### 147 ***Ablation of Ddx3x restricts peripheral B-cell compartment***

148 To evaluate the role of *Ddx3x* in leukocyte development and function, we utilized mice in which  
149 exon 2 of *Ddx3x* was flanked by *LoxP* sites (*Ddx3x<sup>fl/fl</sup>*). Expression of *Cre* recombinase facilitates  
150 deletion of exon 2 and introduction of an early stop codon in exon 3 (**Figure 1a**). We bred female  
151 *Ddx3x<sup>fl/fl</sup>* mice to male *Vav1-Cre* mice (27) to facilitate deletion of *Ddx3x* in hematopoietic cells.  
152 We generated hemizygous male mice (*Ddx3x<sup>fl/y</sup> Vav1-Cre<sup>+</sup>*, henceforth denoted  $\Delta Ddx3x$ ), but  
153 never recovered female mice with a homozygous *Ddx3x<sup>fl/fl</sup> Vav1-Cre<sup>+</sup>* genotype. This may reflect  
154 a role for hematopoietic cells in the embryonic lethality associated with germline *Ddx3x*-  
155 deficiency (25), and a potentially compensatory role for *Ddx3y* in embryogenesis. *Ddx3x* mRNA  
156 expression was reduced 80% in bone marrow and 60% in spleen CD45<sup>+</sup> cells from hemizygous  
157 male  $\Delta Ddx3x$  mice relative to Cre-negative littermate controls (**Figure 1b**).

158 In  $\Delta Ddx3x$  mice, there was a 4-fold reduction in the proportion of circulating B cells as well as  
159 marked reductions in the numbers of CD3<sup>-</sup>CD19<sup>+</sup> B cells in the inguinal lymph nodes (iLN) and  
160 spleen relative to WT mice (**Figure 1c**). Similar frequencies of B cells were observed in the spleen  
161 of all strains of control mice examined, including mice expressing *Cre* but no floxed alleles of  
162 *Ddx3x* (*Ddx3x<sup>WT/Y</sup> Vav1-Cre<sup>+</sup>*) and *Cre*-negative mice with (*Ddx3x<sup>WT/Y</sup> Vav1-Cre<sup>neg</sup>*) or without  
163 (*Ddx3x<sup>fl/y</sup> Vav1-Cre<sup>neg</sup>*) a floxed allele of *Ddx3x* (**Supplemental Figure 1**). In the periphery, when  
164 immature B cells egress from bone marrow, they go through transitional stages (T1, T2, T3) before  
165 acquiring maturity. The number of CD19<sup>+</sup>CD93<sup>+</sup> B cells in stage T1 (IgM<sup>+</sup>CD23<sup>-</sup>), T2  
166 (IgM<sup>+</sup>CD23<sup>+</sup>), and T3 (IgM<sup>low</sup>CD23<sup>+</sup>), were reduced in the spleen of  $\Delta Ddx3x$  mice (**Figure 1d**).  
167 Mature B cells differentiate into two main subpopulations in spleen: follicular B cells (FOB,

168 CD19<sup>+</sup>CD23<sup>+</sup>CD21<sup>int</sup>) and marginal zone B cells (MZB, CD19<sup>+</sup>CD21<sup>hi</sup>CD23<sup>-</sup>). The spleens of  
169  $\Delta Ddx3x$  mice harbor 6.5-fold fewer FOB, but exhibit a concomitant 1.8-fold increase in the  
170 number of B cells with a MZ phenotype (**Figure 1e, Supplemental Figure 1**). In addition, there  
171 were 5.4-fold fewer germinal center (GC) phenotype B cells (GC-B, CD19<sup>+</sup>CD95<sup>+</sup>GL7<sup>+</sup>) and 4.2-  
172 fold fewer plasmablasts (CD19<sup>int</sup>CD138<sup>+</sup>) in the spleen of  $\Delta Ddx3x$  mice relative to controls  
173 animals (**Figure 1f**). Thus, peripheral B cells are markedly reduced in  $\Delta Ddx3x$  mice.

#### 174 *Ddx3x* deficiency is associated with enhanced immunoglobulin production

175 To assess whether reduced expression of *Ddx3x* affects B-cell activity, we measured expression of  
176 activation markers on the surface of splenic B cells and the baseline levels of different  
177 immunoglobulin classes in the sera of the  $\Delta Ddx3x$  and WT mice. Splenic B cells in  $\Delta Ddx3x$  mice  
178 exhibit high expression levels of the costimulatory receptors, CD80 and CD86, relative to control  
179 B cells (**Figure 2a**). Likewise,  $\Delta Ddx3x$  B cells exhibit higher expression of MHC class II than  
180 their counterparts in WT mice (**Figure 2a**). These activation markers were expressed at higher  
181 levels on both FOB (CD19<sup>+</sup>CD1d<sup>low</sup>) and MZB (CD19<sup>+</sup>CD1d<sup>hi</sup>) cells (data not shown). Despite a  
182 reduced number of B cells and plasmablasts (**Figure 1**), sera titers of IgA, IgG, and IgM were  
183 elevated 1.8- to 4.1-fold in  $\Delta Ddx3x$  mice relative to littermate controls (**Figure 2b**). In contrast,  
184 sera IgE levels were decreased almost 9-fold in mice with reduced expression of *Ddx3x* (**Figure**  
185 **2b**). Among IgG subclasses, IgG1, IgG2b, and IgG3 titers were increased 1.7 to 4.2-fold while  
186 IgG2c levels remained unaltered (**Figure 2c**). These data reveal hypergammaglobulinemia in  
187  $\Delta Ddx3x$  mice despite clear deficiencies in development and composition of the B-cell  
188 compartment.

189 In addition to B cells, reduced numbers of T cells and natural killer (NK) cells were recovered

190 from the spleen of  $\Delta Ddx3x$  mice (**Supplemental Figure 2a,b**). As the frequencies of thymic  
191 precursors at the double negative (DN), double positive (DP), and single positive (CD4 or CD8)  
192 stages appeared normal in the absence of  $Ddx3x$  (**Supplemental Figure 2c**), the reduction of  
193 splenic T cells likely occurs in the periphery at a post-developmental stage. The profound  
194 lymphopenia observed in  $\Delta Ddx3x$  mice likely contributes to homeostatic proliferation of the  
195 remaining cells. In fact, the heightened expression of CD21 and reduced levels of CD23 on B cells  
196 (**Figure 1**), as well as the increased immunoglobulin titers (**Figure 2**), are consistent with reported  
197 responses of B cell to lymphopenia (28, 29). Moreover, CD4 and CD8 T cells in the spleens of  
198  $\Delta Ddx3x$  mice also exhibit phenotypes consistent with lymphopenia-induced homeostatic  
199 proliferation (30), including elevated expression levels of activation markers CD44, CD11a, and  
200 CD69 (**Supplemental Figure 2d-f**). The effector CD8 T cells in  $\Delta Ddx3x$  mice also expressed high  
201 levels of CD62L, consistent with the central memory like phenotype of CD8 T cells in  
202 lymphopenic hosts(31).

### 203 *Ddx3x supports B-cell lymphopoiesis*

204 The peripheral B cell lymphopenia in  $\Delta Ddx3x$  mice portends a defect in B-cell development and  
205 maturation in the bone marrow. Notably, the frequency of B220<sup>+</sup> B cells in the bone marrow was  
206 reduced 1.8-fold in  $\Delta Ddx3x$  mice relative to WT counterparts (**Figure 3a**). Frequencies of common  
207 lymphoid progenitor (CLP, Flk2<sup>+</sup>IL7R $\alpha$ <sup>+</sup>) cells were similar in the bone marrow of  $\Delta Ddx3x$  and  
208 control mice. B-cell development in bone marrow is a sequential process of proliferation and BCR  
209 rearrangement that occurs in discrete stages that can be delineated by flow cytometry according to  
210 the Hardy classification system (32). The frequency of pre-pro-B (BP-1<sup>-</sup>CD24<sup>-</sup>), late pro-B (BP-  
211 1<sup>+</sup>CD24<sup>int</sup>), and large pro-B (BP-1<sup>+</sup>CD24<sup>high</sup>) cells among lineage<sup>neg</sup>CD43<sup>+</sup>B220<sup>+</sup> precursors

212 appeared normal in mice with targeted deletion of *Ddx3x* (**Figure 3b,c**). However,  $\Delta Ddx3x$  bone  
213 marrow contained 3.4-fold fewer cells at the early pro-B cell ( $lin^-CD43^+B220^+BP-1^{low}CD24^{high}$ )  
214 stage (**Figure 3c**). Of note, the frequencies of late and large pro-B cells were normal, with similar  
215 expression levels of intracellular IgM ( $\Delta Ddx3x = 47.2 \pm 1.6\%$ , WT =  $47.5 \pm 1.3\%$ ,  $p=0.90$ ,  $n=4$ ,  
216 Student's t-test), suggesting B cells progressing through early pro-B cell stage properly rearranged  
217 heavy chain. Among lineage<sup>neg</sup>CD43<sup>-</sup>B220<sup>+</sup> precursors,  $\Delta Ddx3x$  mice harbored 1.8-fold fewer  
218 small pre-B cells (IgM<sup>-</sup>IgD<sup>-</sup>), 2.1 -fold fewer immature B cells (IgM<sup>+</sup>IgD<sup>-</sup>), and 7.2-fold fewer  
219 circulating mature B cells (IgM<sup>+</sup>IgD<sup>+</sup>) (**Figure 3c**). Thus, there is a progressive and lasting defect  
220 in B-cell lymphopoiesis beginning at the small pre-B cell stage that may contribute to the  
221 peripheral B-cell lymphopenia in  $\Delta Ddx3x$  mice.

### 222 *B cell-intrinsic role for Ddx3x*

223 Since *Ddx3x* expression is broadly reduced in the hematopoietic lineage of  $\Delta Ddx3x$  mice, the  
224 changes observed in the B-cell compartment could be due to intrinsic effects of *Ddx3x* in  
225 developing B cells. To test intrinsic role of *Ddx3x* in B cells, we mixed bone marrow cells from  
226 CD45.2<sup>+</sup>  $\Delta Ddx3x$  mice and CD45.1<sup>+</sup> B6 WT mice (BoyJ), and then transplanted these cells into  
227 lethally irradiated CD45.1<sup>+</sup> B6 WT recipient mice. When donor bone marrow cells were mixed at  
228 a 1:1 or 1:2 ratio, very few CD45.2<sup>+</sup>  $\Delta Ddx3x$  cells were apparent in recipient mice 14 to 16 weeks  
229 after bone marrow reconstitution (data not shown). Therefore, we generated mixed chimera mice  
230 with 4-fold more  $\Delta Ddx3x$  than WT donor cells (**Figure 4a**). Although CD45.2<sup>+</sup>  $\Delta Ddx3x$  donor  
231 cells became detectable by 16 weeks in this context, these cells were still outnumbered 2:1 and  
232 12:1 by CD45.1<sup>+</sup> WT-derived cells in recipient mouse bone marrow and spleen, respectively  
233 (**Figure 4b, c**). Thus,  $\Delta Ddx3x$  cells have a competitive disadvantage compared to WT cells.

234 Despite developing in a predominately WT environment, CD45.2<sup>+</sup>  $\Delta Ddx3x$  donor cells in the  
235 mixed bone marrow chimeric mice still demonstrated defects similar to cells in non-chimeric  
236  $\Delta Ddx3x$  mice (**Figure 4d, e**). Specifically, the percentage of late/small pre-B, immature B and  
237 mature B cells among CD45.2<sup>+</sup>  $\Delta Ddx3x$  cells in the bone marrow did not reach the normal  
238 proportions apparent among WT B cells in the CD45.1<sup>+</sup> donor compartment (**Figure 4d, e**) or in  
239 non-chimeric mice (**Figure 2**). Therefore, reduced  $Ddx3x$  expression confers both a competitive  
240 disadvantage and an intrinsic defect in B-cell differentiation in the bone marrow. In the spleen of  
241 the chimeric mice, the percentage and absolute number of FOB derived from CD45.2<sup>+</sup>  $\Delta Ddx3x$   
242 donor were 18-fold lower than that derived from the CD45.1<sup>+</sup> WT donor precursors, suggesting  
243 that FOB deficit is B-cell intrinsic phenomenon (**Figure 4d, e**). However, the percentage of MZB  
244 derived from the two donors in these chimeric mice is similar (**Figure 4d, e**), suggesting that the  
245 increased frequency of MZB cells in non-chimeric  $\Delta Ddx3x$  mice (**Figure 1**) is a result of B cell-  
246 extrinsic factors.

#### 247 *Ddx3x regulates Brwd1 and Igk rearrangement in small pre-B cells*

248 The loss of developing B cells apparent in  $\Delta Ddx3x$  mice is likely a result of  $Ddx3x$  activity in one  
249 or more stages of B-cell development. The appearance of a prominent and lasting phenotype at the  
250 pre-B stage (fraction D) of B-cell development (**Figure 3**), suggests that  $Ddx3x$  likely plays an  
251 important role in pre-B cells. Thus, we extracted RNA from small pre-B cells (CD3<sup>-</sup>Ly6C<sup>-</sup>Ter119<sup>-</sup>  
252 CD11b<sup>-</sup>Gr-1<sup>-</sup>B220<sup>+</sup>CD43<sup>-</sup>IgM<sup>-</sup>IgD<sup>-</sup>) sorted out of the bone marrow of  $\Delta Ddx3x$  and WT mice. We  
253 then analyzed gene expression using Affymetrix mouse gene 2.0 arrays. We found 477  
254 differentially expressed entities/transcripts that have more than 1.5-fold expression differences  
255 between  $\Delta Ddx3x$  and WT late/pre-B cells with  $p$ -value smaller than 0.05 using unpaired Student's

256 t-test. Among the 477 transcripts, 374 transcripts were expressed at higher levels in the  $\Delta Ddx3x$   
257 late/pre-B cells compared to their WT counterparts, while the remaining 103 transcripts were  
258 expressed at lower levels when *Ddx3x* expression was reduced. Within each experimental group,  
259 each individual mouse (n = 4) had a relatively similar gene expression pattern to other mice in the  
260 same group (**Figure 5a**).

261 Of note,  $\Delta Ddx3x$  pre-B cells exhibit 2.77-fold lower expression of *Brwd1* relative to controls  
262 (**Figure 5a**). *Brwd1* (bromodomain and WD repeat domain containing 1) encodes a protein that  
263 targets and restricts recombination at the immunoglobulin *Kappa* (*Igκ*) locus in B cells (26).  
264 Notably, *Brwd1* mutant mice exhibited a similar B-cell phenotype to that observed in  $\Delta Ddx3x$  mice,  
265 with both mouse strains exhibiting a deficiency at the late/small pre-B cell stage of B-cell  
266 development in bone marrow (**Figure 3**) linked to peripheral B-cell lymphopenia (**Figure 2**) (26).  
267 *Brwd1* mRNA expression is highest in bone marrow B-cell fractions D, E, and F relative to fractions  
268 A, B, and C (Immgen (24)). We therefore hypothesized that *Ddx3x* promotes upregulation of  
269 *Brwd1* expression at the pre-B cell stage, such that reduced expression of *Ddx3x* causes a decrease  
270 in the expression of *brwd1* and defects in B-cell light chain recombination.

271 To test our hypothesis, we first confirmed the expression of *Brwd1* by quantitative PCR (qPCR).  
272 We found that *Brwd1* expression was decreased by ~9-fold in late/small pre-B cells of  $\Delta Ddx3x$   
273 mice (**Figure 5b**). Before *Kappa* DNA rearrangement happens, a germline transcript is expressed  
274 as a consequence of chromatin accessibility of the *Kappa* locus (33). Of note, we found decreased  
275 germline *Igκ* expression in the  $\Delta Ddx3x$  mice (**Figure 5c**). We used semi-quantitative PCR to  
276 demonstrate that rearrangement of  $Vκ-Jκ$  was also diminished 20-30% in the  $\Delta Ddx3x$  late/small  
277 pre-B cells compared to WT cells (**Figure 5d,e**). In this assay, spleen-derived WT  $IgM^+$  B cells

278 served as positive control for *Kappa* rearrangement. In addition, qPCR specifically for V $\kappa$ -J $\kappa$ 1  
279 showed a similar 2.3-fold reduction in V $\kappa$ -J $\kappa$ 1 rearrangement in cells with reduced *Ddx3x*  
280 expression compared to controls (**Figure 5f**). These data demonstrate that B-cell light chain kappa  
281 rearrangement is deficient in the  $\Delta Ddx3x$  mice. In order to facilitate light chain rearrangement,  
282 developing B cells must efficiently exit the cell cycle at the small pre-B cell stage. In conjunction  
283 with reduced light chain rearrangement, more small pre-B cells in  $\Delta Ddx3x$  mice stain positive for  
284 Ki67, a marker of proliferation (**Figure 5g**). In summary, these data show a defect in *Brwd1*  
285 expression, cessation of cell proliferation, and  $\kappa$  chain rearrangement in late/small pre-B cells of  
286  $\Delta Ddx3x$  mice.

## 287 **Discussion**

288 We report that reduced hematopoietic expression of *Ddx3x* results in a marked peripheral  
289 lymphopenia and paucity of mature B-cells that is associated with defective B-cell development  
290 in the bone marrow. T and B cells in  $\Delta Ddx3x$  mice exhibit activated phenotypes and contribute to  
291 elevated sera immunoglobulin titers that are consistent with lymphopenia driven homeostatic  
292 proliferation. Mixed bone marrow chimera experiments demonstrated that the loss of B-cells in  
293  $\Delta Ddx3x$  mice is largely attributable to cell autonomous defects in B-cell development. Gene  
294 expression analyses revealed that *Ddx3x* deficiency correlates with low expression of the histone  
295 reader *Brwd1* and restricted  $\kappa$  light chain recombination. This represents a crucial new cellular  
296 function for *Ddx3x* and the first demonstration of a role for an RNA helicase in B-cell development.

297 Among the various hematopoietic abnormalities in  $\Delta Ddx3x$  mice, the peripheral B-cell  
298 lymphopenia and marked defects at various stages of B-cell development are most notable. These  
299 effects are apparent as early as development of B-cell poised progenitors in the bone marrow, and  
300 significantly impact several B cell subpopulations in peripheral lymphoid tissues. The substantial  
301 reduction in the number of mature B cells should contribute to hypogammaglobulinemia in  
302  $\Delta Ddx3x$  mice. However,  $\Delta Ddx3x$  mice exhibited elevated sera titers of several immunoglobulin  
303 classes, including IgA, IgM, and IgG. Exaggerated production of these isotypes, reduced  
304 expression of CD23, and increased levels of CD21 as well as activation markers on B cells are  
305 phenotypes consistent with lymphopenia associated proliferation (28, 29). In addition to B-cell  
306 defects,  $\Delta Ddx3x$  mice exhibit a marked reduction in splenic T-cell numbers despite relatively  
307 unaltered thymic composition. The remaining peripheral T cells in  $\Delta Ddx3x$  mice were  
308 characterized by increased effector and central memory phenotypes that are similarly consistent



309 with lymphopenia-driven homeostatic proliferation (30, 31). NK cell numbers were also reduced  
310 in the spleen of  $\Delta Ddx3x$  mice, while macrophage and dendritic cell numbers appeared normal.  
311 Overall, these phenotypes argue that *Ddx3x* plays an important role in development of multiple  
312 lymphocyte lineages, such that *Ddx3x*-deficiency contributes to marked lymphopenia and  
313 associated modulation of peripheral lymphocyte phenotype.

314 The mixed bone marrow chimera experiments revealed that defects in B-cell development and  
315 FOB frequency in  $\Delta Ddx3x$  mice were attributed to B-cell intrinsic mechanisms. In contrast, the  
316 increased frequency of CD21-expressing B cells with MZB characteristics cells was dependent on  
317 extrinsic factors (e.g. lymphopenia). The B-cell intrinsic defect in the absence of *Ddx3x* was  
318 apparent as early as the early pro-B cell stage, which is associated with heavy chain recombination.  
319 Although the nature of this defect remains to be explored, two subsequent stages of pro-B-cell  
320 development appeared relatively normal in terms of cell number and intracellular expression of  
321 IgM. Thus, efficiency of heavy chain recombination may be regulated by DDX3X, but the process  
322 can still proceed successfully at low expression levels of *Ddx3x*.

323 A more substantial defect becomes apparent in B cell development beginning at the small pre-B  
324 cell stage and increasing in magnitude in the subsequent immature and mature B cell stages.  
325 Notably, light chain recombination occurs at the small pre-B cell stage of development. Our  
326 microarray analysis identified *Brwdl* as a potential target of *Ddx3x*-mediated dysregulation in  
327 small pre-B cells. The reduced level of *Brwdl* expression in  $\Delta Ddx3x$  small pre-B cells was  
328 associated with diminished transcription of germline *Igk* and impaired *Igk* rearrangement. Defects  
329 in light chain recombination are likely to result in loss of B cells at the second checkpoint in B cell  
330 development, which may explain the reduced numbers of B cell progressing past this stage to

331 populate the periphery of  $\Delta Ddx3x$  mice. These results largely mirror defects seen in mice lacking  
332 *Brwd1* (26, 34). We suggest that DDX3X may enhance transcription of *Brwd1* or stabilize *Brwd1*  
333 transcripts to increase levels of this crucial histone reader protein at key points in B-cell  
334 development.

335 Hematopoietic lineage differentiation and specification is regulated by expression of lineage  
336 specific genes, cell cycle progression, and environmental growth factors (35). Cyclin and cyclin-  
337 dependent kinase (CDK) control of cell cycle progression is pivotal to lineage differentiation (36).  
338 *Ddx3x* can influence the expression levels of cyclins, including cyclin E1 (37). In our microarray  
339 data analysis of small pre-B cells, *Ccnd2* (encodes cyclin D2) is upregulated in the absence of  
340 *Ddx3x*. Consistent with heightened expression of *Ccnd2*, pre-B cells from  $\Delta Ddx3x$  mice exhibit  
341 increased staining with Ki67 that indicates defective exit from the cell cycle. Failure to properly  
342 exit the cell cycle likely contributes to reduced *Brwd1* upregulation and light chain recombination  
343 at the pre-B cell stage. Incidentally, the ephemeral defect in B-cell development at the early pro-  
344 B cell stage in  $\Delta Ddx3x$  mice coincides with coordinated changes in cell cycle and expression of  
345 various cyclin and CDK genes (38). Thus, *Ddx3x* may control cell cycle in developing  
346 lymphocytes by affecting the expression of the cyclin or CDK family proteins.

347 We demonstrate for the first time that *Ddx3x* plays a role in B-cell development and function. The  
348 link between *Ddx3x* and *Brwd1* represents an excited new area of exploration that will further  
349 illuminate mechanisms governing B-cell development that may be impacted in immunodeficiency  
350 or autoimmune disease states.

351

352 **Author contributions**

353 Study concept: Liu K, Scofield RH, Waggoner SN, Harley JB. Data analysis: Liu K, Tuazon J,  
354 Krishnamurthy D, Mandal M, Reynaud D, Harley JB, Waggoner SN. Data acquisition: Liu K,  
355 Tuazon J, Karmele EP, Krishnamurthy D, Perlot T, Foong-Sobis M, Penninger JM. Manuscript  
356 preparation: Liu K, Tuazon J, Karmele EP, Krishnamurthy D, Penninger JM, Karns RB, Mandal  
357 M, Reynaud D, Scofield RH, Waggoner SN, and Harley JB.

358 **Acknowledgments**

359 The authors thank the Cincinnati Children's Comprehensive Mouse and Cancer Core for assistance  
360 with bone marrow chimera generation, and the Gene Expression Core for assistance with  
361 microarray assays. We thank Harsha Seelamneni for maintenance of mouse colony, and H.  
362 Leighton Grimes for provision of *Vav1-Cre* mice. We are indebted to Harinder Singh for his  
363 critical insights and suggestions. All flow cytometric data were acquired using equipment  
364 maintained by the Cincinnati Children's Research Flow Cytometry Core, which is supported in  
365 part by NIH grants AR47363, DK78392 and DK90971.

366 **Conflict-of-interest disclosure:**

367 The authors declare no competing financial interests.

368 The current affiliation for K.L. is Xencor, Inc., 111 West Lemon Avenue, Monrovia, CA, USA.

## 369 References

- 370 1. Bourgeois, C. F., F. Mortreux, and D. Auboeuf. 2016. The multiple functions of RNA  
371 helicases as drivers and regulators of gene expression. *Nat Rev Mol Cell Biol* 17: 426-438.
- 372 2. Rocak, S., and P. Linder. 2004. DEAD-box proteins: the driving forces behind RNA  
373 metabolism. *Nat Rev Mol Cell Biol* 5: 232-241.
- 374 3. Ma, Z., R. Moore, X. Xu, and G. N. Barber. 2013. DDX24 negatively regulates cytosolic  
375 RNA-mediated innate immune signaling. *PLoS Pathog* 9: e1003721.
- 376 4. Parvatiyar, K., Z. Zhang, R. M. Teles, S. Ouyang, Y. Jiang, S. S. Iyer, S. A. Zaver, M.  
377 Schenk, S. Zeng, W. Zhong, Z. J. Liu, R. L. Modlin, Y. J. Liu, and G. Cheng. 2012. The  
378 helicase DDX41 recognizes the bacterial secondary messengers cyclic di-GMP and cyclic  
379 di-AMP to activate a type I interferon immune response. *Nature immunology* 13: 1155-  
380 1161.
- 381 5. Zhang, Z., T. Kim, M. Bao, V. Facchinetti, S. Y. Jung, A. A. Ghaffari, J. Qin, G. Cheng,  
382 and Y. J. Liu. 2011. DDX1, DDX21, and DHX36 helicases form a complex with the  
383 adaptor molecule TRIF to sense dsRNA in dendritic cells. *Immunity* 34: 866-878.
- 384 6. Zheng, Q., J. Hou, Y. Zhou, Z. Li, and X. Cao. 2017. The RNA helicase DDX46 inhibits  
385 innate immunity by entrapping m(6)A-demethylated antiviral transcripts in the nucleus.  
386 *Nature immunology* 18: 1094-1103.
- 387 7. Lumb, J. H., Q. Li, L. M. Popov, S. Ding, M. T. Keith, B. D. Merrill, H. B. Greenberg, J.  
388 B. Li, and J. E. Carette. 2017. DDX6 Represses Aberrant Activation of Interferon-  
389 Stimulated Genes. *Cell Rep* 20: 819-831.
- 390 8. Feng, T., T. Sun, G. Li, W. Pan, K. Wang, and J. Dai. 2017. DEAD-Box Helicase DDX25  
391 Is a Negative Regulator of Type I Interferon Pathway and Facilitates RNA Virus Infection.  
392 *Front Cell Infect Microbiol* 7: 356.
- 393 9. Brai, A., R. Fazi, C. Tintori, C. Zamperini, F. Bugli, M. Sanguinetti, E. Stigliano, J. Este,  
394 R. Badia, S. Franco, M. A. Martinez, J. P. Martinez, A. Meyerhans, F. Saladini, M. Zazzi,  
395 A. Garbelli, G. Maga, and M. Botta. 2016. Human DDX3 protein is a valuable target to  
396 develop broad spectrum antiviral agents. *Proc Natl Acad Sci U S A* 113: 5388-5393.
- 397 10. Gringhuis, S. I., N. Hertoghs, T. M. Kaptein, E. M. Zijlstra-Willems, R. Sarrami-  
398 Fooroshani, J. K. Sprokholt, N. H. van Teijlingen, N. A. Kootstra, T. Booiman, K. A. van  
399 Dort, C. M. Ribeiro, A. Drewniak, and T. B. Geijtenbeek. 2017. HIV-1 blocks the signaling  
400 adaptor MAVS to evade antiviral host defense after sensing of abortive HIV-1 RNA by the  
401 host helicase DDX3. *Nature immunology* 18: 225-235.
- 402 11. Thulasi Raman, S. N., G. Liu, H. M. Pyo, Y. C. Cui, F. Xu, L. E. Ayalew, S. K. Tikoo, and  
403 Y. Zhou. 2016. DDX3 Interacts with Influenza A Virus NS1 and NP Proteins and Exerts  
404 Antiviral Function through Regulation of Stress Granule Formation. *J Virol* 90: 3661-3675.
- 405 12. Soulat, D., T. Burckstummer, S. Westermayer, A. Goncalves, A. Bauch, A. Stefanovic, O.  
406 Hantschel, K. L. Bennett, T. Decker, and G. Superti-Furga. 2008. The DEAD-box helicase  
407 DDX3X is a critical component of the TANK-binding kinase 1-dependent innate immune  
408 response. *EMBO J* 27: 2135-2146.
- 409 13. Ditton, H. J., J. Zimmer, C. Kamp, E. Rajpert-De Meyts, and P. H. Vogt. 2004. The AZFa  
410 gene DBY (DDX3Y) is widely transcribed but the protein is limited to the male germ cells  
411 by translation control. *Hum Mol Genet* 13: 2333-2341.

- 412 14. Foresta, C., A. Ferlin, and E. Moro. 2000. Deletion and expression analysis of AZFa genes  
413 on the human Y chromosome revealed a major role for DBY in male infertility. *Hum Mol*  
414 *Genet* 9: 1161-1169.
- 415 15. Rauschendorf, M. A., J. Zimmer, R. Hanstein, C. Dickemann, and P. H. Vogt. 2011.  
416 Complex transcriptional control of the AZFa gene DDX3Y in human testis. *Int J Androl*  
417 34: 84-96.
- 418 16. Sekiguchi, T., H. Iida, J. Fukumura, and T. Nishimoto. 2004. Human DDX3Y, the Y-  
419 encoded isoform of RNA helicase DDX3, rescues a hamster temperature-sensitive ET24  
420 mutant cell line with a DDX3X mutation. *Experimental cell research* 300: 213-222.
- 421 17. Lai, M. C., Y. H. Lee, and W. Y. Tarn. 2008. The DEAD-box RNA helicase DDX3  
422 associates with export messenger ribonucleoproteins as well as tip-associated protein and  
423 participates in translational control. *Mol Biol Cell* 19: 3847-3858.
- 424 18. Valentin-Vega, Y. A., Y. D. Wang, M. Parker, D. M. Patmore, A. Kanagaraj, J. Moore, M.  
425 Rusch, D. Finkelstein, D. W. Ellison, R. J. Gilbertson, J. Zhang, H. J. Kim, and J. P. Taylor.  
426 2016. Cancer-associated DDX3X mutations drive stress granule assembly and impair  
427 global translation. *Sci Rep* 6: 25996.
- 428 19. Schroder, M. 2010. Human DEAD-box protein 3 has multiple functions in gene regulation  
429 and cell cycle control and is a prime target for viral manipulation. *Biochem Pharmacol* 79:  
430 297-306.
- 431 20. Chang, P. C., C. W. Chi, G. Y. Chau, F. Y. Li, Y. H. Tsai, J. C. Wu, and Y. H. Wu Lee.  
432 2006. DDX3, a DEAD box RNA helicase, is deregulated in hepatitis virus-associated  
433 hepatocellular carcinoma and is involved in cell growth control. *Oncogene* 25: 1991-2003.
- 434 21. Chao, C. H., C. M. Chen, P. L. Cheng, J. W. Shih, A. P. Tsou, and Y. H. Lee. 2006. DDX3,  
435 a DEAD box RNA helicase with tumor growth-suppressive property and transcriptional  
436 regulation activity of the p21waf1/cip1 promoter, is a candidate tumor suppressor. *Cancer*  
437 *Res* 66: 6579-6588.
- 438 22. Oshiumi, H., K. Sakai, M. Matsumoto, and T. Seya. 2010. DEAD/H BOX 3 (DDX3)  
439 helicase binds the RIG-I adaptor IPS-1 to up-regulate IFN-beta-inducing potential. *Eur J*  
440 *Immunol* 40: 940-948.
- 441 23. Oshiumi, H., M. Ikeda, M. Matsumoto, A. Watanabe, O. Takeuchi, S. Akira, N. Kato, K.  
442 Shimotohno, and T. Seya. 2010. Hepatitis C virus core protein abrogates the DDX3  
443 function that enhances IPS-1-mediated IFN-beta induction. *PLoS One* 5: e14258.
- 444 24. Heng, T. S., M. W. Painter, and C. Immunological Genome Project. 2008. The  
445 Immunological Genome Project: networks of gene expression in immune cells. *Nature*  
446 *immunology* 9: 1091-1094.
- 447 25. Chen, C. Y., C. H. Chan, C. M. Chen, Y. S. Tsai, T. Y. Tsai, Y. H. Wu Lee, and L. R. You.  
448 2016. Targeted inactivation of murine Ddx3x: essential roles of Ddx3x in placentation and  
449 embryogenesis. *Hum Mol Genet* 25: 2905-2922.
- 450 26. Mandal, M., K. M. Hamel, M. Maienschein-Cline, A. Tanaka, G. Teng, J. H. Tuteja, J. J.  
451 Bunker, N. Bahroos, J. J. Eppig, D. G. Schatz, and M. R. Clark. 2015. Histone reader  
452 BRWD1 targets and restricts recombination to the Ikg locus. *Nature immunology* 16: 1094-  
453 1103.
- 454 27. Stadtfeld, M., and T. Graf. 2005. Assessing the role of hematopoietic plasticity for  
455 endothelial and hepatocyte development by non-invasive lineage tracing. *Development* 132:  
456 203-213.

- 457 28. Agenes, F., and A. A. Freitas. 1999. Transfer of small resting B cells into immunodeficient  
458 hosts results in the selection of a self-renewing activated B cell population. *J Exp Med* 189:  
459 319-330.
- 460 29. Carvalho, T. L., T. Mota-Santos, A. Cumano, J. Demengeot, and P. Vieira. 2001. Arrested  
461 B lymphopoiesis and persistence of activated B cells in adult interleukin 7(-/-) mice. *J Exp*  
462 *Med* 194: 1141-1150.
- 463 30. Surh, C. D., and J. Sprent. 2000. Homeostatic T cell proliferation: how far can T cells be  
464 activated to self-ligands? *The Journal of experimental medicine* 192: F9-F14.
- 465 31. Goldrath, A. W., and M. J. Bevan. 1999. Low-affinity ligands for the TCR drive  
466 proliferation of mature CD8+ T cells in lymphopenic hosts. *Immunity* 11: 183-190.
- 467 32. Wasserman, R., Y. S. Li, and R. R. Hardy. 1997. Down-regulation of terminal  
468 deoxynucleotidyl transferase by Ig heavy chain in B lineage cells. *J Immunol* 158: 1133-  
469 1138.
- 470 33. Martin, D. J., and B. G. Van Ness. 1989. Identification of a germ line transcript from the  
471 unrearranged kappa gene in human B cells. *Mol Cell Biol* 9: 4560-4562.
- 472 34. Mandal, M., M. Maienschein-Cline, P. Maffucci, M. Veselits, D. E. Kennedy, K. C.  
473 McLean, M. K. Okoreeh, S. Karki, C. Cunningham-Rundles, and M. R. Clark. 2018.  
474 BRWD1 orchestrates epigenetic landscape of late B lymphopoiesis. *Nature*  
475 *communications* 9: 3888.
- 476 35. Zon, L. I. 1995. Developmental biology of hematopoiesis. *Blood* 86: 2876-2891.
- 477 36. Furukawa, Y. 2002. Cell cycle control genes and hematopoietic cell differentiation. *Leuk*  
478 *Lymphoma* 43: 225-231.
- 479 37. Lai, M. C., W. C. Chang, S. Y. Shieh, and W. Y. Tarn. 2010. DDX3 regulates cell growth  
480 through translational control of cyclin E1. *Mol Cell Biol* 30: 5444-5453.
- 481 38. Hardy, R. R., and K. Hayakawa. 2001. B cell development pathways. *Annual review of*  
482 *immunology* 19: 595-621.

483

484 Grant support:

- 485 1. Cincinnati Children's Research Foundation
- 486 2. National Institutes of Health grant DA038017
- 487 3. National Institutes of Health grant AI024717
- 488 4. National Institutes of Health grant AR070549
- 489 5. National Institutes of Health grant HG008666
- 490 6. National Institutes of Health grant AI30830

- 491 7. Clinical & Translational Science Award (CTSA) UL1 TR001425
- 492 8. New Scholar Award from The Lawrence Ellison Foundation
- 493 9. United States Department of Veteran Affairs (BX001834).

494 **Figure legends.**

495 **Figure 1. Ablation of *Ddx3x* expression affects B cell compartment.** (a) Strategy for conditional  
496 deletion of *Ddx3x* (*Ddx3x<sup>fl/fl</sup>*) using targeting construct with *Loxp* sites (triangles) inserted flanking  
497 exon 2 of *Ddx3x* gene. Following removal of neomycin cassette, conditional expression of Cre  
498 causes deletion of exon 2 ( $\Delta Ddx3x$ ) and disruption of transcription by an early stop codon in exon  
499 3. Localization of *Ddx3x* genotyping primers are denoted as 64, 27, and 65. *Ddx3x* mRNA  
500 expression quantified by qRT-PCR (mean  $\pm$  SD) in CD45<sup>+</sup> leukocytes from (b) bone marrow and  
501 (c) spleen in WT (*Vav1<sup>Cre</sup>-Ddx3x<sup>fl/y</sup>*) and hemizygous *Vav1<sup>Cre+</sup>Ddx3x<sup>fl/y</sup>* ( $\Delta Ddx3x$ ) male mice  
502 (n=4/group). (c) Flow cytometry was used to determine the proportion and number of B cells  
503 (CD19<sup>+</sup>CD3<sup>-</sup>) in the blood, inguinal lymph nodes (iLN), and spleens of  $\Delta Ddx3x$  and WT mice  
504 (n=4-6/group). (d) Number of transitional B cells in the spleen determined by flow cytometric  
505 gating of CD3<sup>-</sup>CD19<sup>+</sup> CD93<sup>+</sup> B cells into T1 (IgM<sup>+</sup>CD23<sup>-</sup>), T2 (IgM<sup>+</sup>CD23<sup>+</sup>), and T3 (IgM<sup>-</sup>CD23<sup>+</sup>)  
506 subsets (n=6/group). (e) Proportion and number of follicular (FOB, CD21<sup>int</sup>CD23<sup>+</sup>) and marginal  
507 zone (MZB, CD21<sup>high</sup>CD32<sup>-</sup>) subsets of CD3<sup>-</sup>CD19<sup>+</sup> B cells in the spleen (n=7/group). (f) The  
508 number of germinal center B cells (GC-B, CD3<sup>-</sup>CD19<sup>+</sup>CD95<sup>+</sup>GL7<sup>+</sup>) and plasmablasts (CD3-  
509 CD19<sup>mid</sup>CD138<sup>+</sup>) in the spleen is shown (n=5/group). Data were reproduced in at least two  
510 independent experiments. Significant differences were calculated using Student's t-test. \*p  $\leq$  0.05,  
511 \*\*\*p  $\leq$  0.001, or \*\*\*\*p  $\leq$  0.0001.

512 **Figure 2. Hypergammaglobulinemia in  $\Delta Ddx3x$  mice.** (a) Splenic B cells (CD19<sup>+</sup>Lineage<sup>neg</sup>)  
513 were analyzed (n=4/group) by flow for expression of CD80, CD86, and MHC class II.  
514 Representative histogram and mean MFI of staining ( $\pm$  SEM) on gated B cells is displayed. (b,c)  
515 Baseline serum levels of IgA (n=7/group), IgG (n=7/group), IgM (n=7/group) and IgE  
516 (n=6/group), IgG1 (n=8/group), IgG2b (n=8/group), IgG2c (n=5/group), and IgG3 (n=8/group) in



517 WT and  $\Delta Ddx3x$  mice were determined by ELISA. Immunoglobulin levels were measured in 2  
518 independent experiments. Significant differences were calculated using Student's t-test.  $*p \leq 0.05$ ,  
519  $**p \leq 0.01$ ,  $***p \leq 0.001$ , or  $****p \leq 0.0001$ .

520 **Figure 3. *Ddx3x* supports B-cell lymphopoiesis.** In bone marrow, flow cytometry was used to  
521 determine total number of (a) B cells (B220<sup>+</sup>) and lymphoid progenitors (LP, Ter119<sup>-</sup>Mac1<sup>-</sup>Gr1<sup>-</sup>  
522 CD5<sup>-</sup>CD3<sup>-</sup>CD4<sup>-</sup>CD8<sup>-</sup>B220<sup>-</sup>), including common (CLP, Flk2<sup>+</sup>IL7R $\alpha$ <sup>+</sup>) and B-cell poised (BLP,  
523 Flk2<sup>+</sup>IL-7R $\alpha$ <sup>+</sup>Ly6d<sup>+</sup>) progenitors in WT and  $\Delta Ddx3x$  mice (n=4/group). (b) Representative flow  
524 cytometry analysis of B-cell development in bone marrow of  $\Delta Ddx3x$  and WT mice using the  
525 Hardy classification system. The top panel is gated on Lin<sup>-</sup>CD43<sup>+</sup>B220<sup>+</sup> to delineate fractions A,  
526 B, C, and C', which correspond to pre-pro- early pro-, late pro-, and early/large pre-B cell stages  
527 of development. The lower panel is gated on Lin<sup>-</sup>CD43<sup>-</sup>B220<sup>+</sup> to delineate fractions D (late/small  
528 pre-B), E (immature B), and F (mature B) of B-cell development (n=7/group). (c) The number of  
529 cells in each subset is plotted. Results were repeated in 2 independent experiments. The histogram  
530 insets represent (n=4/group) intracellular IgM staining on CD19<sup>+</sup>sIgM<sup>-</sup>CD43<sup>+</sup>BP-1<sup>+</sup> pro-B cells  
531 (fraction C and C'). Significant differences were calculated using Student's t-test.  $**p \leq 0.01$ ,  
532  $***p \leq 0.001$ , or  $****p \leq 0.0001$ .

533 **Figure 4. Cell intrinsic contribution of *Ddx3x* to B cell biology.** (a) Schematic of bone marrow  
534 transplantation experiments. Lethally irradiated CD45.1<sup>+</sup> WT mice received total of 2.5 million  
535 bone marrow cells from CD45.1<sup>+</sup> WT mice and CD45.2<sup>+</sup>  $\Delta Ddx3x$  mice mixed at 1:4 ratio. (b,c)  
536 Percentage of CD45.1<sup>+</sup> and CD45.2<sup>+</sup> donor cells among bone marrow and splenic leukocytes in  
537 the chimeric mice (n=6/group). (d) Representative contour plots from flow cytometry analysis of  
538 lineage<sup>neg</sup>CD43<sup>-</sup>B220<sup>+</sup> bone marrow cells (left panel) and CD19<sup>+</sup>CD3<sup>-</sup>spleen cells revealing  
539 proportions of late/small pre-B cell (fraction D, IgM<sup>neg</sup>IgD<sup>neg</sup>), immature B cells (fraction E,

540 IgM<sup>+</sup>IgD<sup>neg</sup>), mature B cells (fraction F, IgM<sup>+</sup>IgD<sup>+</sup>), FOB (CD21<sup>int</sup>CD23<sup>+</sup>), and MZB  
541 (CD21<sup>hi</sup>CD23<sup>-</sup>) among the CD45.1<sup>+</sup> or CD45.2<sup>+</sup> donor cell populations in the chimeric recipient  
542 mice (n=6/group). (e) Percentage and absolute number of CD45.1-derived or CD45.2-derived  
543 late/small pre-B cells, immature B cells, and mature B cells in bone marrow, as well as splenic  
544 FOB and MZB cells spleens of chimeric mice. Data are representative of two independent  
545 experiments. Significant differences were calculated using Student's t-test. \*p ≤ 0.05, \*\*\*p ≤ 0.001,  
546 or \*\*\*\*p ≤ 0.0001.

547 **Figure 5. *Ddx3x* deficiency associated with reduced *Brwd1* expression and *Kappa* chain**  
548 **rearrangement in small pre-B cells.** (a) Clustered heat map of top 15 up-regulated and down-  
549 regulated genes in late/small pre-B cell from  $\Delta Ddx3x$  mice compared to WT mice (n=4/group).  
550 (b) *Brwd1* and (c) germline *Igκ* mRNA expression in late/small pre-B cell from  $\Delta Ddx3x$  mice  
551 compared to WT mice as determined by qPCR (n=4/group). (d,e) Semi-quantitative PCR  
552 analysis of rearranged *Igκ* in bone marrow late/small pre-B cell from  $\Delta Ddx3x$  and WT mice. WT  
553 splenic CD19<sup>+</sup>IgM<sup>+</sup> cells were used as positive control (n=4/group). Quantification of V $\kappa$ -  
554 J $\kappa$ 1,2,4,5 band intensity is plotted. (f) Quantitative real-time PCR analysis for expression of V $\kappa$ -  
555 J $\kappa$ 1 in late/small pre-B cell from  $\Delta Ddx3x$  and WT mice (n=4/group). (g) Bone marrow small pre-  
556 B cells (CD19<sup>+</sup>sIgM<sup>-</sup>CD43<sup>-</sup>) were assessed for Ki67 staining. Data in b-e from two independent  
557 experiments and are presented as mean ± SD. Significant differences were calculated using  
558 Student's t-test. \*p ≤ 0.05, \*\*p ≤ 0.01, or \*\*\*p ≤ 0.001.

559

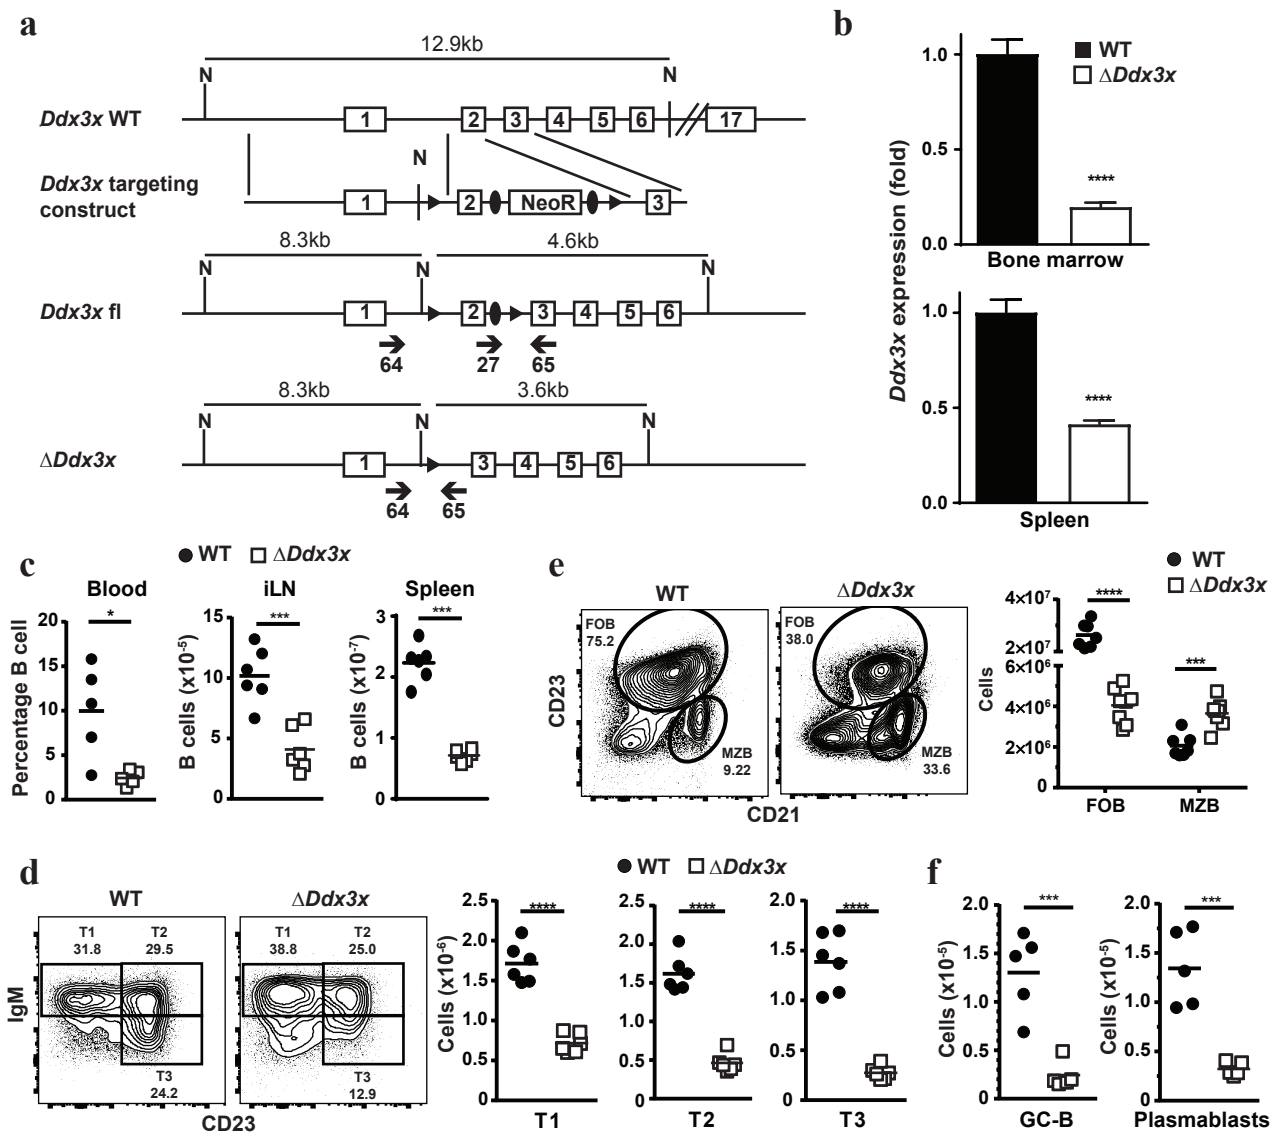

**a**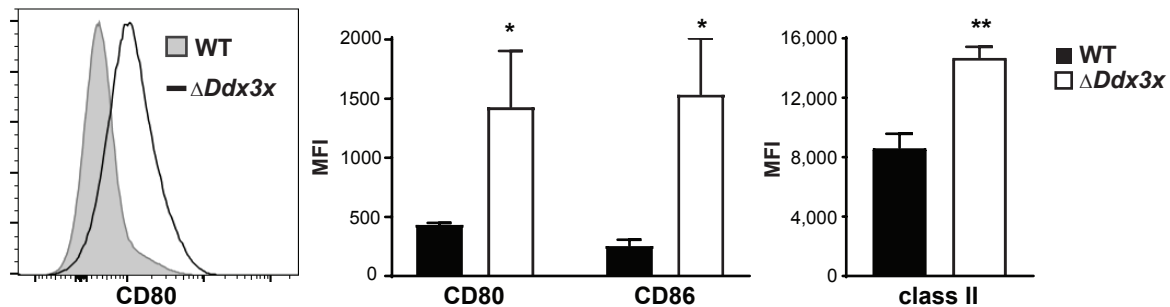**b**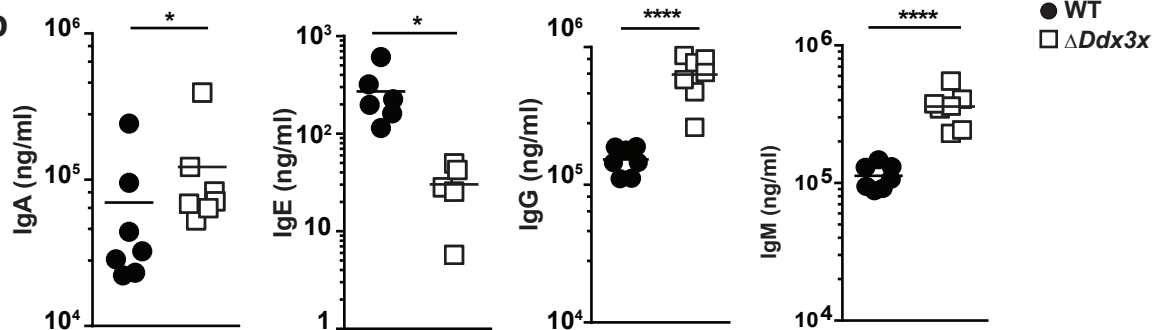**c**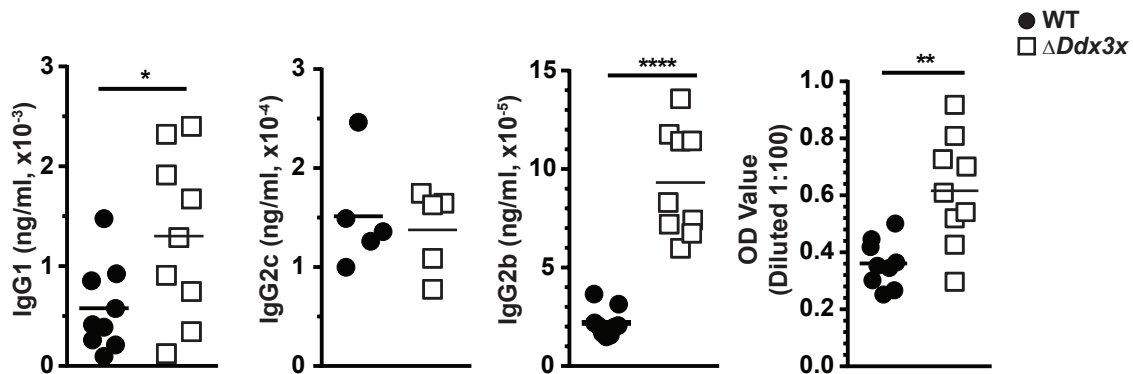

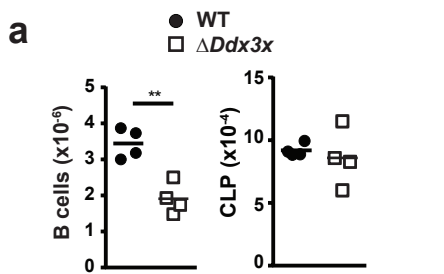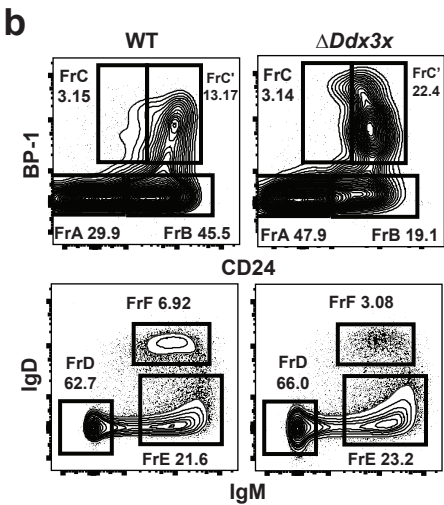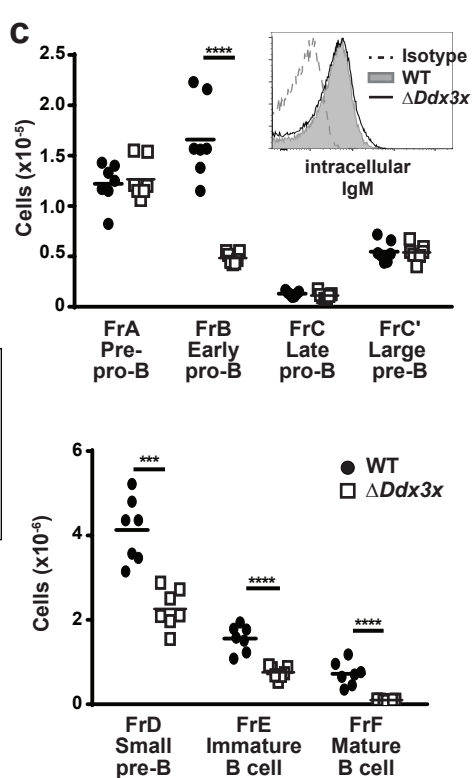

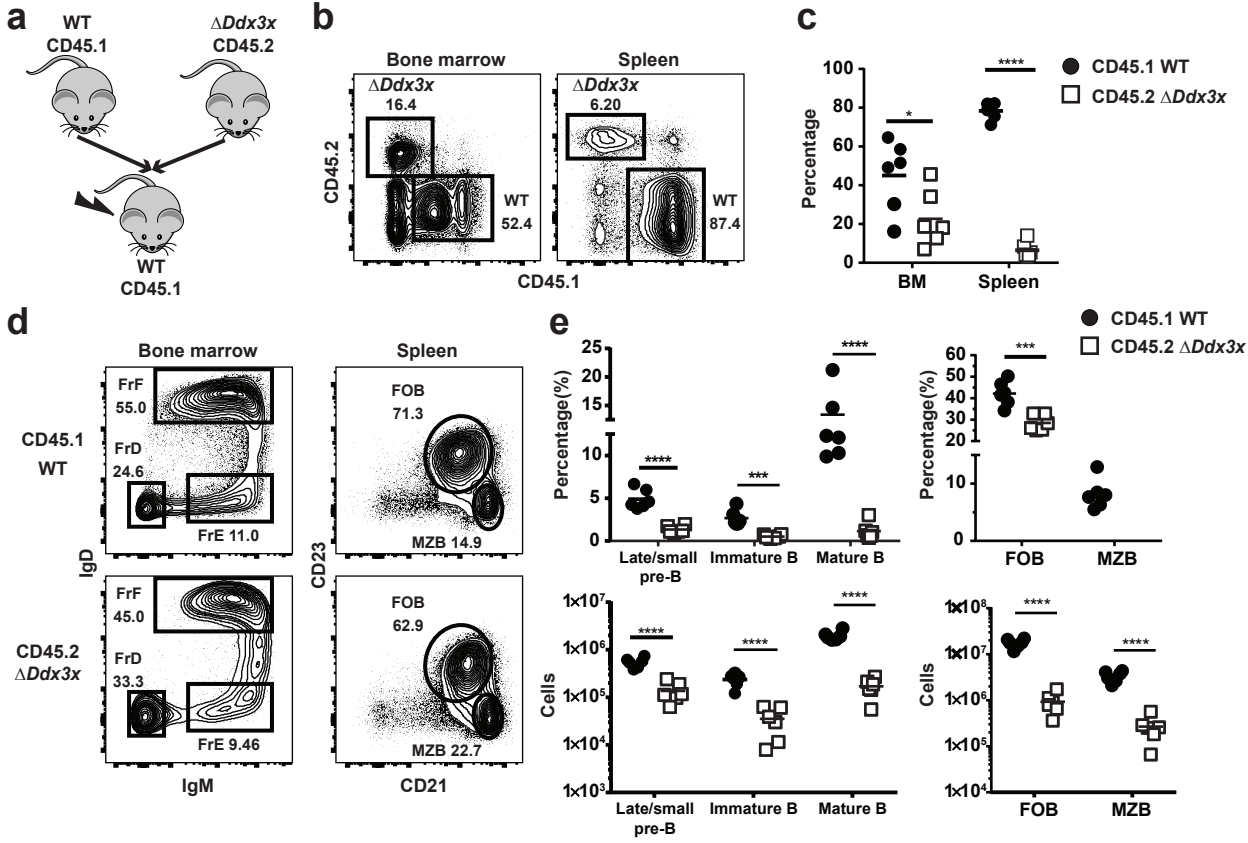

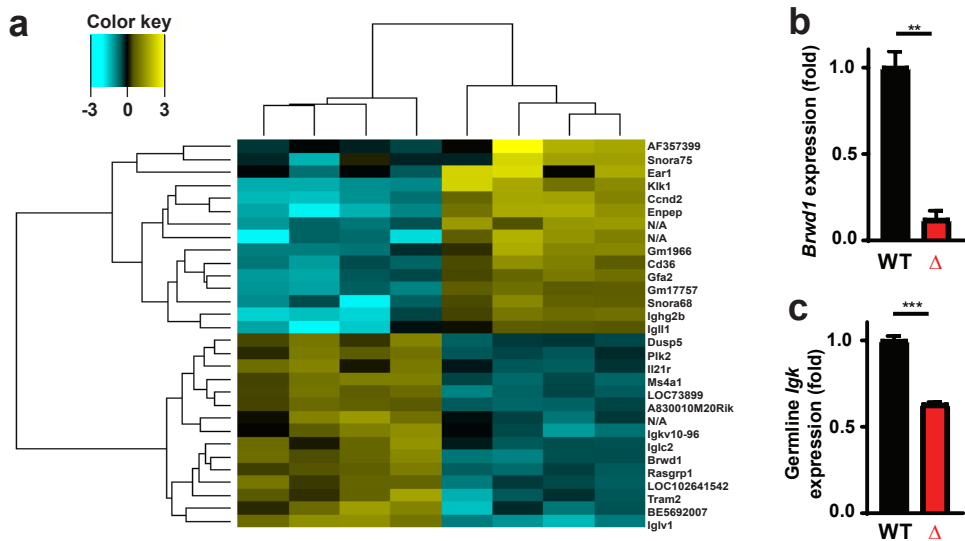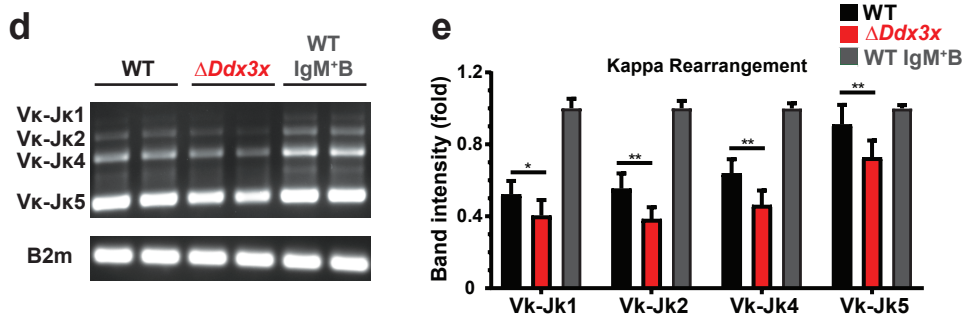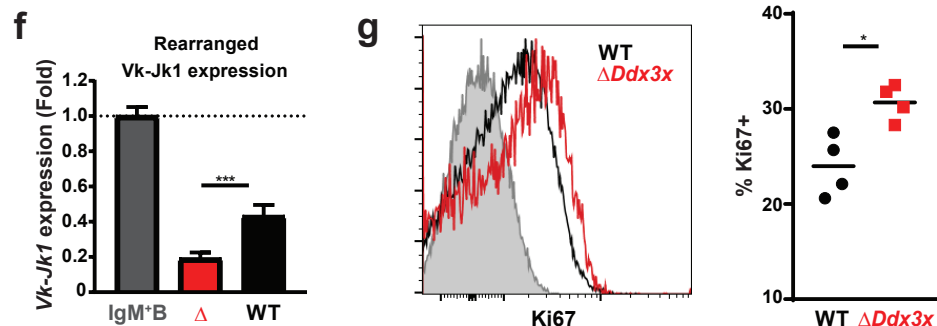

Source: https://www.biorxiv.org/content/10.1101/452086v1.full.pdf
